# Supplementary material for: The times, they are a-changin’: tracking shifts in mental health signals from early phase to later phase of the COVID-19 pandemic in Australia
Source: PubMed Central journal article supplement — BMJ Glob Health. 2022 Jan 20;7(1):e007081. doi: 10.1136/bmjgh-2021-007081 (PMC8889467; doi:10.1136/bmjgh-2021-007081), 2022-01-20
Supplement: bmjgh-2021-007081supp001.pdf [file bmjgh-2021-007081supp001.pdf]

## Appendix

### 1. Data retrieval and post-processing

We utilise the Twitter academic full track application programming interface (AFT-API) to search and retrieve geotweets in Australia. Compared to the normal Twitter API which returns 1% of the total tweets for the data privacy purpose, AFT-API enables us to fully retrieve tweets with the pre-defined queries and improve the data coverage and representativeness.<sup>18</sup> We defined the searching terms as “*pandemic, epidemic, virus, covid\*, coronavirus, corona, and vaccin\**”; the search timespan was defined as from January 1, 2020 to May 31, 2021 with the country defined as “*AU*” (Australia). Consequently, 244,406 geotweets were retrieved from the total +860 million tweets in Australia. These geotweets contain two types of location information at the individual level and place level: 1) an accurate pair of X, Y coordinates of a place where a geotweet was posted if a user activated the location function in Twitter, and 2) the name of a place (e.g., a suburb) which has been further assigned the X, Y coordinates as the centroid of the place.

### 2. Methods

#### 2.1 Sentimental analysis

We implemented the Valence Aware Dictionary for sentiment Reasoning (VADER) model, a lexicon and rule-based sentiment analysis tool that has been specifically attuned to sentiments expressed in microblog-like contexts, such as social media posts.<sup>22</sup> The VADER text sentiment analysis combines lexical features and five simple heuristics and utilizes a human-centric approach via the combination of qualitative analysis and empirical validation using human raters, i.e., the wisdom of the crowd.<sup>22</sup> VADER returns four scores, i.e., positive, negative, neutral, and compound. Scores for positive, negative, neutral are ratios for proportions of text that fall in these three categories, respectively. The compound, on the other hand, is a weighted composite score that sums the valence scores of each word in the lexicon with a normalized value range between -1 (most extreme negative) and +1 (most extreme positive). In this study, we used the compound score as the mental health signals. The VADER library is open-sourced at <https://github.com/cjhutto/vaderSentiment>. Before the sentimental analysis, we applied lemmatization, a technique that identifies the inflected forms of a word and returns its base form (e.g., “better” is lemmatized as “good”). Regular expression was implemented to match and remove URLs and characters following “@” in their texts. In addition, we applied basic transformations, such as “’ve” to “have”, “n’t” to “not”, “’re” to “are, etc., aiming to further enhance the comprehension of the algorithm. Considering that the VADER algorithm recognizes the influence of capitalization, emoticons, and certain punctuations on sentiments, we kept them in this step.

#### 2.2 Emotion analysis

We then implemented National Research Council Canada Emotional Lexicon (NRCLex),<sup>23</sup> a Massachusetts Institute of Technology-approved PyPI model (open-sourced at <https://pypi.org/project/NRCLex/>) that predicts the sentiments and emotion of a given text by documenting a list of English words and their associations with four pairs of primary bipolar emotions (i.e., eight basic emotions): joy (feeling happy) versus sadness (feeling sad); anger (feeling angry) versus fear (feeling of being afraid); trust (stronger admiration and weaker acceptance) versus disgust (feeling something is wrong or nasty); and surprise (being unprepared for something) versus anticipation (looking forward positively to something).<sup>7</sup> The affection dictionary of NRCLex contains approximately 27,000 words and is based on the National Research Council Canada lexicon and the Natural Language ToolKit (NLTK) library's WordNet synonym sets.<sup>23</sup> The annotations in NRCLex are manually completed via crowdsourcing. As NRCLex is based on a word matching mechanism, no preprocessing step is involved besides the removal of links and characters following “@” using regular expressions. We further group the eight types of emotions to two types of mental health signals: fear, sadness, anger, and disgust to represent pessimistic mental health signals, and joy, anticipation, trust, and surprise to represent optimistic mental health signals.

#### 2.3 Word cloud mapping

We presented the frequencies of keywords mentioned in Twitter via WordCloud, a graphical representation of word frequency that gives greater prominence to words that appear more frequently mentioned in source texts.<sup>24</sup> In this study, we divided the geotweets into four phases with two different mental health signals (i.e., optimistic and pessimistic) and visualize the word cloud by phase and by mental signal. Besides the preprocessing steps before the sentimental analysis, we further decapitalized words, removed punctuations and numbers, and removed words documented in the build-in stopword list in Table A1. In addition, we removed the words of “covid”, “covid-19”,

"virus", "coronavirus", "coronaviru", "corona", "pandemic", "epidemic", "people", given their ubiquitous occurrence in all phases but providing limited contextual information.

Table A1. Wordcloud built-in stopwords

|                                                                                                                                                                                                                                                                                                                                                                                                                                                                                                                                                                                                                                                                                                                                                                                                                                                                                                                                                                                                                                                                                                                                                                                                                                                                                                                                                                                                                                                                                                                                                                                                                                                                                                                            |
|----------------------------------------------------------------------------------------------------------------------------------------------------------------------------------------------------------------------------------------------------------------------------------------------------------------------------------------------------------------------------------------------------------------------------------------------------------------------------------------------------------------------------------------------------------------------------------------------------------------------------------------------------------------------------------------------------------------------------------------------------------------------------------------------------------------------------------------------------------------------------------------------------------------------------------------------------------------------------------------------------------------------------------------------------------------------------------------------------------------------------------------------------------------------------------------------------------------------------------------------------------------------------------------------------------------------------------------------------------------------------------------------------------------------------------------------------------------------------------------------------------------------------------------------------------------------------------------------------------------------------------------------------------------------------------------------------------------------------|
| <p>'between', 'cannot', 'against', 'in', "don't", 'not', 'here', 'nor', "shan't", 'than', 'your', 'about', 'com', 'herself', 'again', 'does', 'further', 'otherwise', 'their', 'these', "wouldn't", 'where', "hadn't", 'myself', 'would', "why's", 'only', "they'd", "hasn't", 'so', 'she', "she's", 'all', 'own', 'like', 'for', 'to', "i'll", 'was', 'whom', "how's", 'her', 'because', 'therefore', 'him', 'as', 'ourselves', 'me', 'can', 'himself', 'or', 'r', "haven't", 'themselves', 'am', 'the', 'them', 'ever', 'doing', 'by', 'http', 'most', 'who', "they've", "you'd", 'are', 'over', 'if', 'k', 'other', "we've", "they're", 'this', 'get', 'same', 'before', 'had', 'yourselves', "he'll", 'should', 'when', "mustn't", 'shall', "isn't", 'above', 'ours', 'there', 'some', 'do', 'has', 'however', "we're", 'which', "i'd", "here's", 'it', 'out', 'is', 'no', 'www', 'while', "we'll", "doesn't", "when's", 'at', 'itself', "let's", 'hence', 'my', "where's", "we'd", 'did', 'few', "it's", 'i', 'ought', 'else', "can't", 'then', 'you', "you've", "couldn't", 'hers', 'a', 'theirs', 'and', 'how', "you're", 'they', 'being', 'very', "that's", 'any', 'such', 'too', 'why', "aren't", 'once', 'we', 'both', 'until', "she'll", 'under', 'could', "what's", 'yours', 'an', 'but', 'after', "wasn't", 'into', "didn't", 'during', 'below', 'yourself', 'he's", "you'll", 'our', 'that', 'with', 'from', "there's", 'he', 'through', 'off', 'what', 'its', "weren't", 'i'm', 'have', "i've", 'each', "they'll", 'up', 'were', "won't", 'also', 'his', 'more', "who's", "shouldn't", 'of', 'just', 'on', 'those', 'be', "he'd", 'been', 'since', 'down', "she'd", 'having', 'positive' and 'negative'</p> |
|----------------------------------------------------------------------------------------------------------------------------------------------------------------------------------------------------------------------------------------------------------------------------------------------------------------------------------------------------------------------------------------------------------------------------------------------------------------------------------------------------------------------------------------------------------------------------------------------------------------------------------------------------------------------------------------------------------------------------------------------------------------------------------------------------------------------------------------------------------------------------------------------------------------------------------------------------------------------------------------------------------------------------------------------------------------------------------------------------------------------------------------------------------------------------------------------------------------------------------------------------------------------------------------------------------------------------------------------------------------------------------------------------------------------------------------------------------------------------------------------------------------------------------------------------------------------------------------------------------------------------------------------------------------------------------------------------------------------------|

#### 2.4 Kernel density mapping

We examined the spatial variation of mental health using kernel density estimates (KDE) based on the geocoded point locations of geotweets. A kernel density is a density of features within a given bandwidth based on a kernel function<sup>26</sup>. In this study, we adopted the kernel density function tool in ArcGIS 10.8. A crucial point for KDE is the selection of the bandwidth. We started with the tool's default bandwidth calculated based on the Silverman's Rule of Thumb<sup>31</sup> and this method has the advantage in coping with spatial data outliers (i.e., points that are far away from the rest of the points), and is commonly used in spatial econometrics to identify optimal search radius at different spatial scales. We also tested the robustness of the KDE to bandwidth by adjusting the bandwidth through trial-and-error to identify the most suitable bandwidth for use to produce density estimate of sentiment scores in eight capital cities. Each KDE map was symbolised by a blue-red gradient colour scheme using Jenks natural breaks classification method to enhance the discrepancies between relatively high and low values: blue coloured areas with lower sentiment scores (termed as coldspots) indicating the concentrations of pessimistic mentality, yellow to orange coloured areas indicating neutral mentality, and the red coloured areas with higher sentiment scores (termed as hotspots) indicating the concentrations of optimistic mentality.

#### 2.5 Open-source workflow

We built a sharable workflow embedding all the models we used in this study. Our analytical procedure is reproducible through this workflow assembling three components (VADER model, NRCLex model and WordCloud model) can be run by users with limited programming background via an open-source platform, KNIME (<https://www.knime.com/>). This workflow can be accessed in [10.6084/m9.figshare.14985153](https://doi.org/10.6084/m9.figshare.14985153).

### 3. Results

Table A2. Statistical summary of geotweets across space and time

|                                    | Sydney    | Melbourne | Brisbane  | Perth     | Adelaide  | Hobart  | Darwin  | Canberra | All capital cities | % Phase <sup>D</sup> |
|------------------------------------|-----------|-----------|-----------|-----------|-----------|---------|---------|----------|--------------------|----------------------|
| Phase 1                            | 2,800     | 2,674     | 875       | 633       | 451       | 59      | 51      | 328      | 7,871              | 4.09                 |
| Phase 2                            | 23,107    | 23,928    | 7,297     | 5,859     | 4,312     | 997     | 403     | 2,800    | 68,703             | 35.71                |
| Phase 3                            | 26,123    | 45,013    | 7,671     | 7,003     | 6,044     | 779     | 716     | 3,045    | 96,394             | 50.10                |
| Phase 4                            | 5,866     | 7,540     | 2,097     | 2,020     | 1,066     | 98      | 66      | 671      | 19,424             | 10.10                |
| Total geotweets                    | 57,896    | 79,155    | 17,940    | 15,515    | 11,873    | 1,933   | 1,236   | 6,844    | 192,392            | —                    |
| Total population <sup>A</sup>      | 5,367,206 | 5,159,211 | 2,560,720 | 2,125,114 | 1,376,601 | 238,834 | 147,231 | 431,380  | 17,406,297         | —                    |
| % Geotweets in a city <sup>B</sup> | 30.09     | 41.14     | 9.32      | 8.06      | 6.17      | 1.00    | 0.64    | 3.56     | —                  | —                    |
| G/P ratio (per 1000) <sup>C</sup>  | 10.79     | 15.34     | 7.01      | 7.30      | 8.62      | 8.09    | 8.39    | 15.87    | 11.05              | —                    |

A. Data source: Australian Bureau of Statistics, 2020<sup>25</sup>

B. This percentage is calculated as the number of geotweets in a city over the total number of geotweets.

C. This G/P ratio is calculated as the number of geotweets in a city over the total number of population living in that city per 1,000 people.

D. This percentage is calculated as the number of geotweets in a certain phase the total number of geotweets.

Table A3. Sentiment component scores at the national level over four phases

| Period        | Mean   | 95% CI           | Change over phases (%) <sup>*</sup> |
|---------------|--------|------------------|-------------------------------------|
| Full timeline | 0.047  | (0.042, 0.053)   | —                                   |
| Phase 1       | -0.043 | (-0.052, -0.034) | —                                   |
| Phase 2       | 0.058  | (0.055, 0.062)   | 174.14 (154.84, 194.55)             |
| Phase 3       | 0.064  | (0.061, 0.066)   | 9.38 (6.06, 9.84)                   |
| Phase 4       | 0.043  | (0.037, 0.049)   | -48.84 (-64.86, -34.69)             |

Note: <sup>\*</sup>the change of sentiment scores is calculated as the difference of sentiment score in the previous and later phase over the one in the later phase.

Table A4. Proportions of emotion (%) by type at the national level over four phases

| Emotion type | Full timeline |                  | Phase 1 |                  | Phase 2 |                  | Phase 3 |                  | Phase 4 |                  |
|--------------|---------------|------------------|---------|------------------|---------|------------------|---------|------------------|---------|------------------|
|              | Mean          | 95% CI           | Mean    | 95% CI           | Mean    | 95% CI           | Mean    | 95% CI           | Mean    | 95% CI           |
| Fear         | 19.485        | (19.325, 19.652) | 21.520  | (20.819, 22.270) | 18.578  | (18.409, 18.721) | 19.218  | (19.073, 19.367) | 19.843  | (19.463, 20.205) |
| Anger        | 9.569         | (9.452, 9.682)   | 10.614  | (9.969, 11.273)  | 9.172   | (9.038, 9.316)   | 9.479   | (9.377, 9.577)   | 9.443   | (9.264, 9.634)   |
| Sadness      | 13.806        | (13.701, 13.919) | 13.894  | (13.324, 14.489) | 13.560  | (13.403, 13.700) | 13.902  | (13.794, 14.013) | 13.664  | (13.428, 13.883) |
| Disgust      | 7.135         | (7.011, 7.256)   | 9.268   | (8.734, 9.855)   | 6.540   | (6.438, 6.642)   | 6.920   | (6.830, 7.002)   | 6.704   | (6.511, 6.889)   |
| Surprise     | 7.482         | (7.392, 7.572)   | 7.087   | (6.654, 7.514)   | 7.515   | (7.409, 7.625)   | 7.614   | (7.506, 7.743)   | 7.277   | (7.135, 7.408)   |
| Anticipation | 15.564        | (15.430, 15.691) | 14.730  | (14.034, 15.394) | 16.251  | (16.110, 16.385) | 15.433  | (15.311, 15.562) | 15.985  | (15.695, 16.282) |
| Trust        | 17.444        | (17.251, 17.609) | 15.196  | (14.285, 16.097) | 18.226  | (18.004, 18.470) | 17.648  | (17.511, 17.793) | 17.767  | (17.464, 18.097) |
| Joy          | 9.516         | (9.387, 9.629)   | 7.691   | (7.139, 8.258)   | 10.157  | (10.022, 10.298) | 9.787   | (9.672, 9.908)   | 9.316   | (9.105, 9.535)   |

Table A5. Frequencies of keywords discussed by the public over four phases (to be continued)

| Optimistic mentality |       |        |            |       |        |           |       |        |           |       |        |
|----------------------|-------|--------|------------|-------|--------|-----------|-------|--------|-----------|-------|--------|
| Phase 1              |       |        | Phase 2    |       |        | Phase 3   |       |        | Phase 4   |       |        |
| Keywords             | Count | Ratio* | Keywords   | Count | Ratio* | Keywords  | Count | Ratio* | Keywords  | Count | Ratio* |
| well                 | 145   | 1.88   | lockdown   | 1534  | 1.84   | lockdown  | 3573  | 2.77   | vaccine   | 1023  | 3.86   |
| great                | 143   | 1.86   | go         | 1462  | 1.76   | well      | 2504  | 1.94   | well      | 592   | 2.23   |
| go                   | 137   | 1.78   | time       | 1461  | 1.75   | go        | 2281  | 1.77   | lockdown  | 592   | 2.23   |
| quarantine           | 126   | 1.64   | well       | 1436  | 1.72   | vaccine   | 1899  | 1.47   | go        | 494   | 1.86   |
| good                 | 111   | 1.44   | thank      | 1341  | 1.61   | thank     | 1842  | 1.43   | vaccinate | 403   | 1.52   |
| hope                 | 106   | 1.38   | great      | 1206  | 1.45   | one       | 1742  | 1.35   | one       | 384   | 1.45   |
| know                 | 101   | 1.31   | need       | 1153  | 1.38   | great     | 1698  | 1.32   | need      | 383   | 1.45   |
| love                 | 99    | 1.29   | work       | 1120  | 1.34   | need      | 1670  | 1.30   | good      | 367   | 1.38   |
| vaccine              | 98    | 1.27   | u          | 1091  | 1.31   | time      | 1666  | 1.29   | australia | 364   | 1.37   |
| china                | 97    | 1.26   | good       | 1059  | 1.27   | hope      | 1583  | 1.23   | thank     | 345   | 1.30   |
| australia            | 96    | 1.25   | love       | 1038  | 1.25   | work      | 1527  | 1.19   | great     | 333   | 1.26   |
| need                 | 91    | 1.18   | make       | 1035  | 1.24   | day       | 1489  | 1.16   | time      | 332   | 1.25   |
| work                 | 91    | 1.18   | one        | 1028  | 1.23   | say       | 1457  | 1.13   | day       | 318   | 1.20   |
| time                 | 86    | 1.12   | australia  | 1019  | 1.22   | australia | 1456  | 1.13   | vaccine   | 318   | 1.20   |
| make                 | 85    | 1.10   | day        | 976   | 1.17   | make      | 1436  | 1.11   | make      | 289   | 1.09   |
| help                 | 85    | 1.10   | help       | 931   | 1.12   | good      | 1420  | 1.10   | see       | 287   | 1.08   |
| say                  | 84    | 1.09   | new        | 922   | 1.11   | think     | 1404  | 1.09   | work      | 285   | 1.08   |
| thank                | 81    | 1.05   | support    | 881   | 1.06   | love      | 1318  | 1.02   | say       | 285   | 1.08   |
| day                  | 78    | 1.01   | quarantine | 871   | 1.05   | help      | 1289  | 1.00   | love      | 276   | 1.04   |
| think                | 77    | 1.00   | hope       | 833   | 1.00   | new       | 1288  | 1.00   | take      | 265   | 1.00   |

Note: \* the ratio is calculated as the count of a given word over the count of the lowest ranked word (the word on the bottom)

Table A5. Frequencies of keywords discussed by the public over four phases

| Pessimistic mentality |       |        |           |       |        |           |       |        |             |       |        |
|-----------------------|-------|--------|-----------|-------|--------|-----------|-------|--------|-------------|-------|--------|
| Phase 1               |       |        | Phase 2   |       |        | Phase 3   |       |        | Phase 4     |       |        |
| Keywords              | Count | Ratio* | Keywords  | Count | Ratio* | Keywords  | Count | Ratio* | Keywords    | Count | Ratio* |
| china                 | 226   | 2.31   | go        | 1331  | 2.32   | lockdown  | 1946  | 2.22   | vaccine     | 912   | 4.24   |
| go                    | 206   | 2.10   | u         | 1170  | 2.04   | go        | 1739  | 1.98   | lockdown    | 410   | 1.91   |
| australia             | 158   | 1.61   | lockdown  | 929   | 1.62   | u         | 1445  | 1.65   | go          | 397   | 1.85   |
| say                   | 146   | 1.49   | say       | 913   | 1.59   | say       | 1391  | 1.59   | australia   | 371   | 1.73   |
| one                   | 144   | 1.47   | die       | 908   | 1.58   | vaccine   | 1342  | 1.53   | one         | 337   | 1.57   |
| bad                   | 142   | 1.45   | one       | 901   | 1.57   | one       | 1330  | 1.52   | say         | 323   | 1.50   |
| need                  | 126   | 1.29   | need      | 837   | 1.46   | die       | 1267  | 1.44   | vaccinate   | 305   | 1.42   |
| die                   | 124   | 1.27   | death     | 780   | 1.36   | need      | 1167  | 1.33   | u           | 268   | 1.25   |
| panic                 | 118   | 1.20   | time      | 776   | 1.35   | bad       | 1161  | 1.32   | vaccination | 261   | 1.21   |
| death                 | 117   | 1.19   | crisi     | 770   | 1.34   | australia | 1051  | 1.20   | government  | 252   | 1.17   |
| spread                | 116   | 1.18   | australia | 769   | 1.34   | know      | 1038  | 1.18   | need        | 249   | 1.16   |
| toilet paper          | 116   | 1.18   | bad       | 767   | 1.34   | think     | 1035  | 1.18   | india       | 244   | 1.13   |
| fear                  | 115   | 1.17   | think     | 733   | 1.28   | make      | 1010  | 1.15   | death       | 243   | 1.13   |
| stop                  | 106   | 1.08   | know      | 687   | 1.20   | take      | 940   | 1.07   | risk        | 241   | 1.12   |
| quarantine            | 104   | 1.06   | make      | 658   | 1.15   | death     | 939   | 1.07   | die         | 236   | 1.10   |
| make                  | 104   | 1.06   | kill      | 655   | 1.14   | time      | 927   | 1.06   | country     | 229   | 1.07   |
| time                  | 101   | 1.03   | take      | 615   | 1.07   | trump     | 915   | 1.04   | bad         | 227   | 1.06   |
| infect                | 100   | 1.02   | trump     | 601   | 1.05   | victoria  | 908   | 1.04   | know        | 225   | 1.05   |
| case                  | 100   | 1.02   | fuck      | 581   | 1.01   | many      | 896   | 1.02   | case        | 217   | 1.01   |
| know                  | 98    | 1.00   | china     | 574   | 1.00   | see       | 877   | 1.00   | still       | 215   | 1.00   |

Note: \* the ratio is calculated as the count of a given word over the count of the lowest ranked word (the word on the bottom)

Table A6. Sentiment component scores over four phases in eight capital cities

|         | Sydney |                 | Melbourne |                  | Brisbane |                 | Perth  |                 | Adelaide |                  | Darwin |                 | Hobart |                 | Canberra |                 |
|---------|--------|-----------------|-----------|------------------|----------|-----------------|--------|-----------------|----------|------------------|--------|-----------------|--------|-----------------|----------|-----------------|
|         | Mean   | 95% CI          | Mean      | 95% CI           | Mean     | 95% CI          | Mean   | 95% CI          | Mean     | 95% CI           | Mean   | 95% CI          | Mean   | 95% CI          | Mean     | 95% CI          |
| Phase 1 | -0.011 | (-0.059, 0.049) | -0.078    | (-0.126, -0.032) | -0.047   | (-0.110, 0.014) | -0.038 | (-0.104, 0.030) | -0.109   | (-0.193, -0.029) | 0.011  | (-0.118, 0.142) | 0.030  | (-0.109, 0.176) | -0.014   | (-0.105, 0.085) |
| Phase 2 | 0.079  | (0.071, 0.086)  | 0.065     | (0.055, 0.077)   | 0.078    | (0.061, 0.093)  | 0.032  | (0.014, 0.048)  | 0.118    | (0.102, 0.135)   | 0.055  | (-0.026, 0.133) | 0.046  | (0.002, 0.089)  | 0.057    | (0.033, 0.081)  |
| Phase 3 | 0.068  | (0.062, 0.075)  | 0.074     | (0.067, 0.081)   | 0.071    | (0.059, 0.085)  | 0.047  | (0.032, 0.062)  | 0.067    | (0.047, 0.085)   | 0.026  | (-0.022, 0.078) | 0.051  | (0.007, 0.092)  | 0.086    | (0.064, 0.107)  |
| Phase 4 | 0.038  | (0.021, 0.054)  | 0.056     | (0.040, 0.071)   | 0.067    | (0.042, 0.090)  | -0.005 | (-0.032, 0.022) | 0.063    | (0.024, 0.100)   | 0.021  | (-0.102, 0.152) | 0.080  | (-0.032, 0.193) | 0.048    | (0.042, 0.054)  |

Table A7. Changes of sentiment scores (%) over four phases in eight capital cities

| Period       | Sydney | Melbourne | Brisbane | Perth | Adelaide | Darwin | Hobart | Canberra |
|--------------|--------|-----------|----------|-------|----------|--------|--------|----------|
| Phase 1 to 2 | 113.9  | 220.0     | 160.3    | 218.8 | 192.4    | 80.0   | 34.8   | 124.6    |
| Phase 2 to 3 | -16.2  | 12.2      | -9.9     | 31.9  | -76.1    | -111.5 | 9.8    | 33.7     |
| Phase 3 to 4 | -78.9  | -32.1     | -6.0     | 104.1 | -6.3     | -23.8  | 36.3   | -79.2    |

Table A8. Proportions of emotion (%) by type in eight capital cities in Phase 1 (early phase)

| Emotion type | Sydney |                  | Melbourne |                  | Brisbane |                  | Perth  |                  | Adelaide |                  | Darwin |                  | Hobart |                  | Canberra |                  |
|--------------|--------|------------------|-----------|------------------|----------|------------------|--------|------------------|----------|------------------|--------|------------------|--------|------------------|----------|------------------|
|              | Mean   | 95% CI           | Mean      | 95% CI           | Mean     | 95% CI           | Mean   | 95% CI           | Mean     | 95% CI           | Mean   | 95% CI           | Mean   | 95% CI           | Mean     | 95% CI           |
| Fear         | 20.679 | (20.307, 21.402) | 21.044    | (20.842, 21.309) | 20.564   | (20.295, 20.845) | 21.535 | (20.925, 22.591) | 19.261   | (18.761, 19.725) | 21.250 | (20.059, 24.138) | 21.147 | (19.898, 24.157) | 21.983   | (21.050, 23.203) |
| Anger        | 10.052 | (9.908, 10.201)  | 9.579     | (9.549, 9.657)   | 10.090   | (10.023, 10.135) | 10.041 | (9.949, 10.035)  | 10.617   | (10.379, 10.785) | 7.500  | (6.897, 8.193)   | 9.677  | (8.929, 10.674)  | 9.020    | (8.897, 9.313)   |
| Anticipation | 14.574 | (14.506, 14.593) | 15.261    | (15.096, 15.291) | 14.237   | (14.241, 14.540) | 15.188 | (15.081, 15.296) | 15.107   | (14.628, 15.653) | 17.500 | (15.814, 20.000) | 17.204 | (16.292, 18.622) | 15.173   | (14.627, 15.447) |
| Trust        | 16.649 | (16.498, 16.712) | 16.025    | (15.961, 16.138) | 15.413   | (15.316, 15.490) | 15.598 | (15.297, 15.788) | 15.611   | (15.465, 16.284) | 16.667 | (15.172, 16.952) | 12.545 | (12.245, 12.760) | 18.996   | (18.626, 19.422) |
| Surprise     | 7.635  | (7.417, 7.746)   | 7.498     | (7.398, 7.619)   | 7.375    | (7.344, 7.508)   | 7.168  | (7.090, 7.250)   | 7.595    | (7.396, 7.781)   | 7.083  | (6.207, 7.346)   | 6.810  | (6.180, 6.888)   | 6.631    | (6.372, 6.685)   |
| Sadness      | 13.498 | (13.349, 13.694) | 13.889    | (13.798, 14.006) | 13.702   | (13.464, 13.733) | 13.925 | (13.568, 14.190) | 13.051   | (12.883, 13.187) | 13.333 | (13.103, 14.119) | 15.771 | (15.306, 16.292) | 14.875   | (14.678, 15.359) |
| Disgust      | 9.150  | (8.754, 9.363)   | 8.979     | (8.644, 9.202)   | 9.897    | (9.617, 10.171)  | 9.157  | (8.710, 9.727)   | 10.155   | (8.945, 11.107)  | 9.583  | (8.276, 10.171)  | 10.394 | (8.989, 10.969)  | 7.049    | (6.372, 7.542)   |
| Joy          | 7.764  | (7.528, 8.022)   | 7.724     | (7.649, 7.841)   | 8.722    | (8.296, 8.982)   | 7.389  | (6.632, 7.871)   | 8.603    | (8.430, 8.689)   | 7.083  | (6.207, 7.346)   | 6.452  | (5.056, 7.143)   | 6.272    | (6.127, 6.278)   |

Table A9. Proportions of emotion (%) by type in eight capital cities in Phase 2 (the first wave of the pandemic)

| Emotion type | Sydney |                  | Melbourne |                  | Brisbane |                  | Perth  |                  | Adelaide |                  | Darwin |                  | Hobart |                  | Canberra |                  |
|--------------|--------|------------------|-----------|------------------|----------|------------------|--------|------------------|----------|------------------|--------|------------------|--------|------------------|----------|------------------|
|              | Mean   | 95% CI           | Mean      | 95% CI           | Mean     | 95% CI           | Mean   | 95% CI           | Mean     | 95% CI           | Mean   | 95% CI           | Mean   | 95% CI           | Mean     | 95% CI           |
| Fear         | 18.496 | (18.478, 18.506) | 18.478    | (18.456, 18.602) | 18.260   | (18.255, 18.268) | 19.650 | (19.520, 19.730) | 17.952   | (17.793, 18.135) | 18.920 | (18.515, 19.299) | 21.883 | (21.760, 21.958) | 19.613   | (19.565, 19.747) |
| Anger        | 8.795  | (8.752, 8.813)   | 9.107     | (9.043, 9.178)   | 8.970    | (8.889, 9.009)   | 9.718  | (9.660, 9.726)   | 8.405    | (8.323, 8.491)   | 8.169  | (7.863, 8.199)   | 9.660  | (9.313, 10.139)  | 8.953    | (8.927, 9.024)   |
| Anticipation | 16.591 | (16.561, 16.599) | 16.059    | (15.962, 16.120) | 16.608   | (16.555, 16.650) | 15.939 | (15.934, 15.962) | 17.462   | (17.287, 17.582) | 17.418 | (17.323, 17.490) | 15.402 | (15.190, 15.474) | 15.473   | (15.414, 15.521) |
| Trust        | 18.756 | (18.746, 18.830) | 18.279    | (18.181, 18.350) | 18.789   | (18.711, 18.867) | 17.317 | (17.306, 17.371) | 18.631   | (18.621, 18.679) | 20.376 | (20.361, 20.548) | 16.120 | (15.702, 16.632) | 19.074   | (19.008, 19.104) |
| Surprise     | 7.276  | (7.229, 7.329)   | 7.516     | (7.482, 7.535)   | 7.468    | (7.439, 7.478)   | 7.464  | (7.453, 7.493)   | 7.605    | (7.556, 7.781)   | 6.573  | (6.551, 6.582)   | 5.906  | (5.805, 5.940)   | 7.280    | (7.159, 7.321)   |
| Sadness      | 13.151 | (13.115, 13.166) | 13.681    | (13.613, 13.691) | 13.261   | (13.247, 13.313) | 13.784 | (13.656, 13.797) | 13.457   | (13.346, 13.589) | 13.005 | (13.007, 13.043) | 16.140 | (16.113, 16.148) | 14.261   | (14.157, 14.393) |
| Disgust      | 6.248  | (6.202, 6.292)   | 6.779     | (6.752, 6.788)   | 6.175    | (6.091, 6.182)   | 7.065  | (6.963, 7.246)   | 5.937    | (5.772, 6.127)   | 5.399  | (5.003, 5.851)   | 6.973  | (6.764, 7.271)   | 6.337    | (6.248, 6.450)   |
| Joy          | 10.687 | (10.676, 10.725) | 10.101    | (10.071, 10.135) | 10.469   | (10.452, 10.566) | 9.062  | (9.053, 9.076)   | 10.552   | (10.524, 10.593) | 10.141 | (10.133, 10.303) | 7.916  | (7.886, 7.925)   | 9.059    | (8.999, 9.062)   |

Table A10. Proportions of emotion (%) by type in eight capital cities in Phase 3 (the second wave of the pandemic)

| Emotion type | Sydney |                  | Melbourne |                  | Brisbane |                  | Perth  |                  | Adelaide |                  | Darwin |                  | Hobart |                  | Canberra |                  |
|--------------|--------|------------------|-----------|------------------|----------|------------------|--------|------------------|----------|------------------|--------|------------------|--------|------------------|----------|------------------|
|              | Mean   | 95% CI           | Mean      | 95% CI           | Mean     | 95% CI           | Mean   | 95% CI           | Mean     | 95% CI           | Mean   | 95% CI           | Mean   | 95% CI           | Mean     | 95% CI           |
| Fear         | 19.204 | (19.164, 19.260) | 19.268    | (19.251, 19.315) | 18.852   | (18.774, 18.869) | 20.291 | (20.228, 20.399) | 18.709   | (18.384, 19.019) | 20.644 | (20.485, 20.691) | 19.148 | (18.935, 19.398) | 19.439   | (19.428, 19.479) |
| Anger        | 9.079  | (9.055, 9.096)   | 9.455     | (9.439, 9.488)   | 9.336    | (9.286, 9.355)   | 9.494  | (9.317, 9.573)   | 9.644    | (9.430, 9.854)   | 10.405 | (10.202, 10.552) | 9.018  | (8.783, 9.166)   | 9.118    | (9.086, 9.132)   |
| Anticipation | 15.688 | (15.608, 15.737) | 15.319    | (15.284, 15.324) | 15.676   | (15.667, 15.715) | 15.180 | (15.109, 15.288) | 16.140   | (16.124, 16.143) | 15.380 | (15.063, 15.757) | 16.237 | (16.092, 16.608) | 15.415   | (15.265, 15.573) |
| Trust        | 17.848 | (17.774, 17.862) | 17.708    | (17.663, 17.711) | 17.810   | (17.752, 17.882) | 17.030 | (17.000, 17.061) | 16.638   | (16.491, 16.803) | 18.373 | (18.362, 18.498) | 17.964 | (17.773, 18.195) | 17.156   | (16.751, 17.600) |
| Surprise     | 7.590  | (7.539, 7.625)   | 7.437     | (7.425, 7.450)   | 7.639    | (7.577, 7.690)   | 7.614  | (7.579, 7.624)   | 8.421    | (8.358, 8.460)   | 7.143  | (7.128, 7.167)   | 7.077  | (6.785, 7.487)   | 8.333    | (8.027, 8.781)   |
| Sadness      | 13.822 | (13.816, 13.837) | 14.012    | (13.997, 14.056) | 13.891   | (13.839, 13.910) | 13.909 | (13.810, 14.004) | 14.000   | (13.961, 14.011) | 13.439 | (13.278, 13.570) | 13.680 | (13.604, 13.707) | 14.494   | (14.220, 14.698) |
| Disgust      | 6.595  | (6.565, 6.620)   | 7.139     | (7.108, 7.184)   | 6.656    | (6.603, 6.678)   | 6.955  | (6.924, 6.987)   | 6.860    | (6.524, 7.287)   | 5.636  | (5.459, 5.767)   | 6.840  | (6.594, 6.968)   | 6.669    | (6.526, 6.734)   |
| Joy          | 10.174 | (10.146, 10.196) | 9.661     | (9.647, 9.748)   | 10.141   | (10.109, 10.203) | 9.526  | (9.459, 9.640)   | 9.588    | (9.490, 9.660)   | 8.980  | (8.987, 9.005)   | 10.036 | (9.931, 10.975)  | 9.377    | (9.257, 9.444)   |

Table A11. Proportions of emotion (%) by type in eight capital cities in Phase 4 (later phase)

| Emotion type | Sydney |                  | Melbourne |                  | Brisbane |                  | Perth  |                  | Adelaide |                  | Darwin |                  | Hobart |                  | Canberra |                  |
|--------------|--------|------------------|-----------|------------------|----------|------------------|--------|------------------|----------|------------------|--------|------------------|--------|------------------|----------|------------------|
|              | Mean   | 95% CI           | Mean      | 95% CI           | Mean     | 95% CI           | Mean   | 95% CI           | Mean     | 95% CI           | Mean   | 95% CI           | Mean   | 95% CI           | Mean     | 95% CI           |
| Fear         | 19.866 | (19.846, 19.927) | 19.431    | (19.111, 19.921) | 18.472   | (18.013, 18.793) | 20.582 | (20.378, 20.861) | 19.959   | (19.723, 20.422) | 21.260 | (20.736, 21.542) | 19.091 | (18.292, 20.845) | 19.123   | (19.098, 19.144) |
| Anger        | 9.268  | (9.203, 9.323)   | 9.418     | (9.313, 9.455)   | 8.893    | (8.734, 8.993)   | 9.635  | (9.420, 9.819)   | 9.783    | (9.655, 9.830)   | 8.661  | (7.700, 9.109)   | 9.773  | (9.761, 9.915)   | 9.318    | (9.305, 9.328)   |
| Anticipation | 15.785 | (15.761, 15.839) | 16.325    | (15.746, 16.711) | 16.499   | (16.459, 16.678) | 16.105 | (16.008, 16.228) | 16.561   | (16.522, 16.631) | 15.486 | (15.310, 15.765) | 14.318 | (13.680, 14.460) | 15.756   | (15.741, 15.767) |
| Trust        | 18.219 | (18.120, 18.250) | 17.570    | (17.506, 17.751) | 18.483   | (18.340, 18.758) | 17.581 | (17.394, 17.828) | 16.580   | (16.565, 16.699) | 18.635 | (18.023, 20.379) | 18.864 | (18.565, 19.147) | 17.827   | (17.812, 17.842) |
| Surprise     | 7.201  | (7.188, 7.264)   | 7.230     | (7.137, 7.323)   | 7.359    | (7.104, 7.589)   | 7.264  | (7.049, 7.475)   | 7.468    | (7.411, 7.478)   | 6.824  | (6.162, 7.171)   | 7.045  | (6.188, 7.351)   | 7.530    | (7.519, 7.541)   |
| Sadness      | 13.812 | (13.752, 13.844) | 13.703    | (13.350, 14.101) | 13.710   | (13.496, 13.868) | 13.084 | (13.073, 13.125) | 13.219   | (12.919, 13.318) | 11.286 | (10.382, 11.822) | 16.591 | (15.894, 17.596) | 13.762   | (13.752, 13.772) |
| Disgust      | 6.431  | (6.297, 6.524)   | 6.940     | (6.798, 7.067)   | 6.275    | (6.235, 6.280)   | 6.654  | (6.612, 6.721)   | 7.132    | (6.866, 7.352)   | 6.037  | (5.768, 6.202)   | 4.773  | (3.908, 5.471)   | 6.904    | (6.804, 6.907)   |
| Joy          | 9.419  | (9.410, 9.452)   | 9.382     | (9.090, 9.619)   | 10.309   | (9.989, 10.670)  | 9.096  | (8.697, 9.412)   | 9.298    | (9.132, 9.507)   | 11.811 | (11.628, 12.304) | 9.545  | (9.445, 9.569)   | 9.780    | (9.602, 9.864)   |

Table A12. Changes of emotion (%) by type in eight capital cities over four phases

|                     | Fear   | Anger  | Sadness | Disgust | Joy    | Anticipation | Trust  | Surprise |
|---------------------|--------|--------|---------|---------|--------|--------------|--------|----------|
| <i>Phase 1 to 2</i> |        |        |         |         |        |              |        |          |
| Sydney              | -2.142 | -1.209 | -0.272  | -2.882  | 2.912  | 1.907        | 2.100  | -0.413   |
| Melbourne           | -2.564 | -0.472 | -0.209  | -2.199  | 2.376  | 0.796        | 2.254  | 0.018    |
| Brisbane            | -2.304 | -1.120 | -0.442  | -3.723  | 1.747  | 2.372        | 3.377  | 0.093    |
| Perth               | -1.887 | -0.323 | -0.140  | -2.092  | 1.674  | 0.752        | 1.719  | 0.296    |
| Adelaide            | -1.309 | -2.212 | 0.407   | -4.218  | 1.950  | 2.356        | 3.016  | 0.010    |
| Hobart              | 0.736  | -0.018 | 0.370   | -3.421  | 1.465  | -1.802       | 3.575  | -0.904   |
| Darwin              | -2.330 | 0.669  | -0.329  | -4.184  | 3.058  | -0.082       | 3.709  | -0.511   |
| Canberra            | -2.370 | -0.118 | -0.613  | -0.712  | 2.786  | 0.300        | 0.078  | 0.649    |
| <i>Phase 2 to 3</i> |        |        |         |         |        |              |        |          |
| Sydney              | 0.785  | 0.280  | 0.663   | 0.323   | -0.566 | -0.886       | -0.872 | 0.274    |
| Melbourne           | 0.787  | 0.348  | 0.332   | 0.360   | -0.439 | -0.738       | -0.571 | -0.079   |
| Brisbane            | 0.592  | 0.367  | 0.630   | 0.481   | -0.328 | -0.933       | -0.979 | 0.171    |
| Perth               | 0.647  | -0.223 | 0.127   | -0.110  | 0.462  | -0.763       | -0.288 | 0.148    |
| Adelaide            | 0.756  | 1.238  | 0.543   | 0.923   | -0.965 | -1.323       | -1.989 | 0.816    |
| Hobart              | -2.735 | -0.642 | -2.460  | -0.133  | 2.119  | 0.835        | 1.845  | 1.170    |
| Darwin              | 1.724  | 2.236  | 0.435   | 0.237   | -1.161 | -2.038       | -2.002 | 0.570    |
| Canberra            | -0.174 | 0.215  | 0.233   | 0.332   | 0.319  | -0.059       | -1.919 | 1.053    |
| <i>Phase 3 to 4</i> |        |        |         |         |        |              |        |          |
| Sydney              | 0.648  | 0.196  | 0.029   | -0.132  | -0.765 | 0.042        | 0.306  | -0.324   |
| Melbourne           | 0.164  | -0.037 | -0.309  | -0.199  | -0.279 | 1.006        | -0.138 | -0.207   |
| Brisbane            | -0.379 | -0.444 | -0.182  | -0.380  | -0.168 | 0.823        | 0.673  | -0.280   |
| Perth               | 0.288  | 0.140  | -0.828  | -0.302  | -0.429 | 0.929        | 0.551  | -0.348   |
| Adelaide            | 1.250  | 0.140  | -0.782  | 0.272   | -0.290 | 0.421        | -0.058 | -0.953   |
| Hobart              | -0.057 | 0.755  | 2.910   | -2.068  | -0.490 | -1.919       | 0.899  | -0.031   |
| Darwin              | 0.616  | -1.743 | -2.153  | 0.401   | 2.831  | 0.106        | 0.262  | -0.319   |
| Canberra            | 1.176  | 0.113  | -2.340  | 0.131   | 0.130  | -0.676       | 2.137  | -0.671   |
